# Supplementary figures and images for: ESAMP: event-sourced architecture for materials provenance management and application to accelerated materials discovery
Source: Royal Society of Chemistry journal article supplement (doi:10.1039/d3dd00054k), 2023-01-01

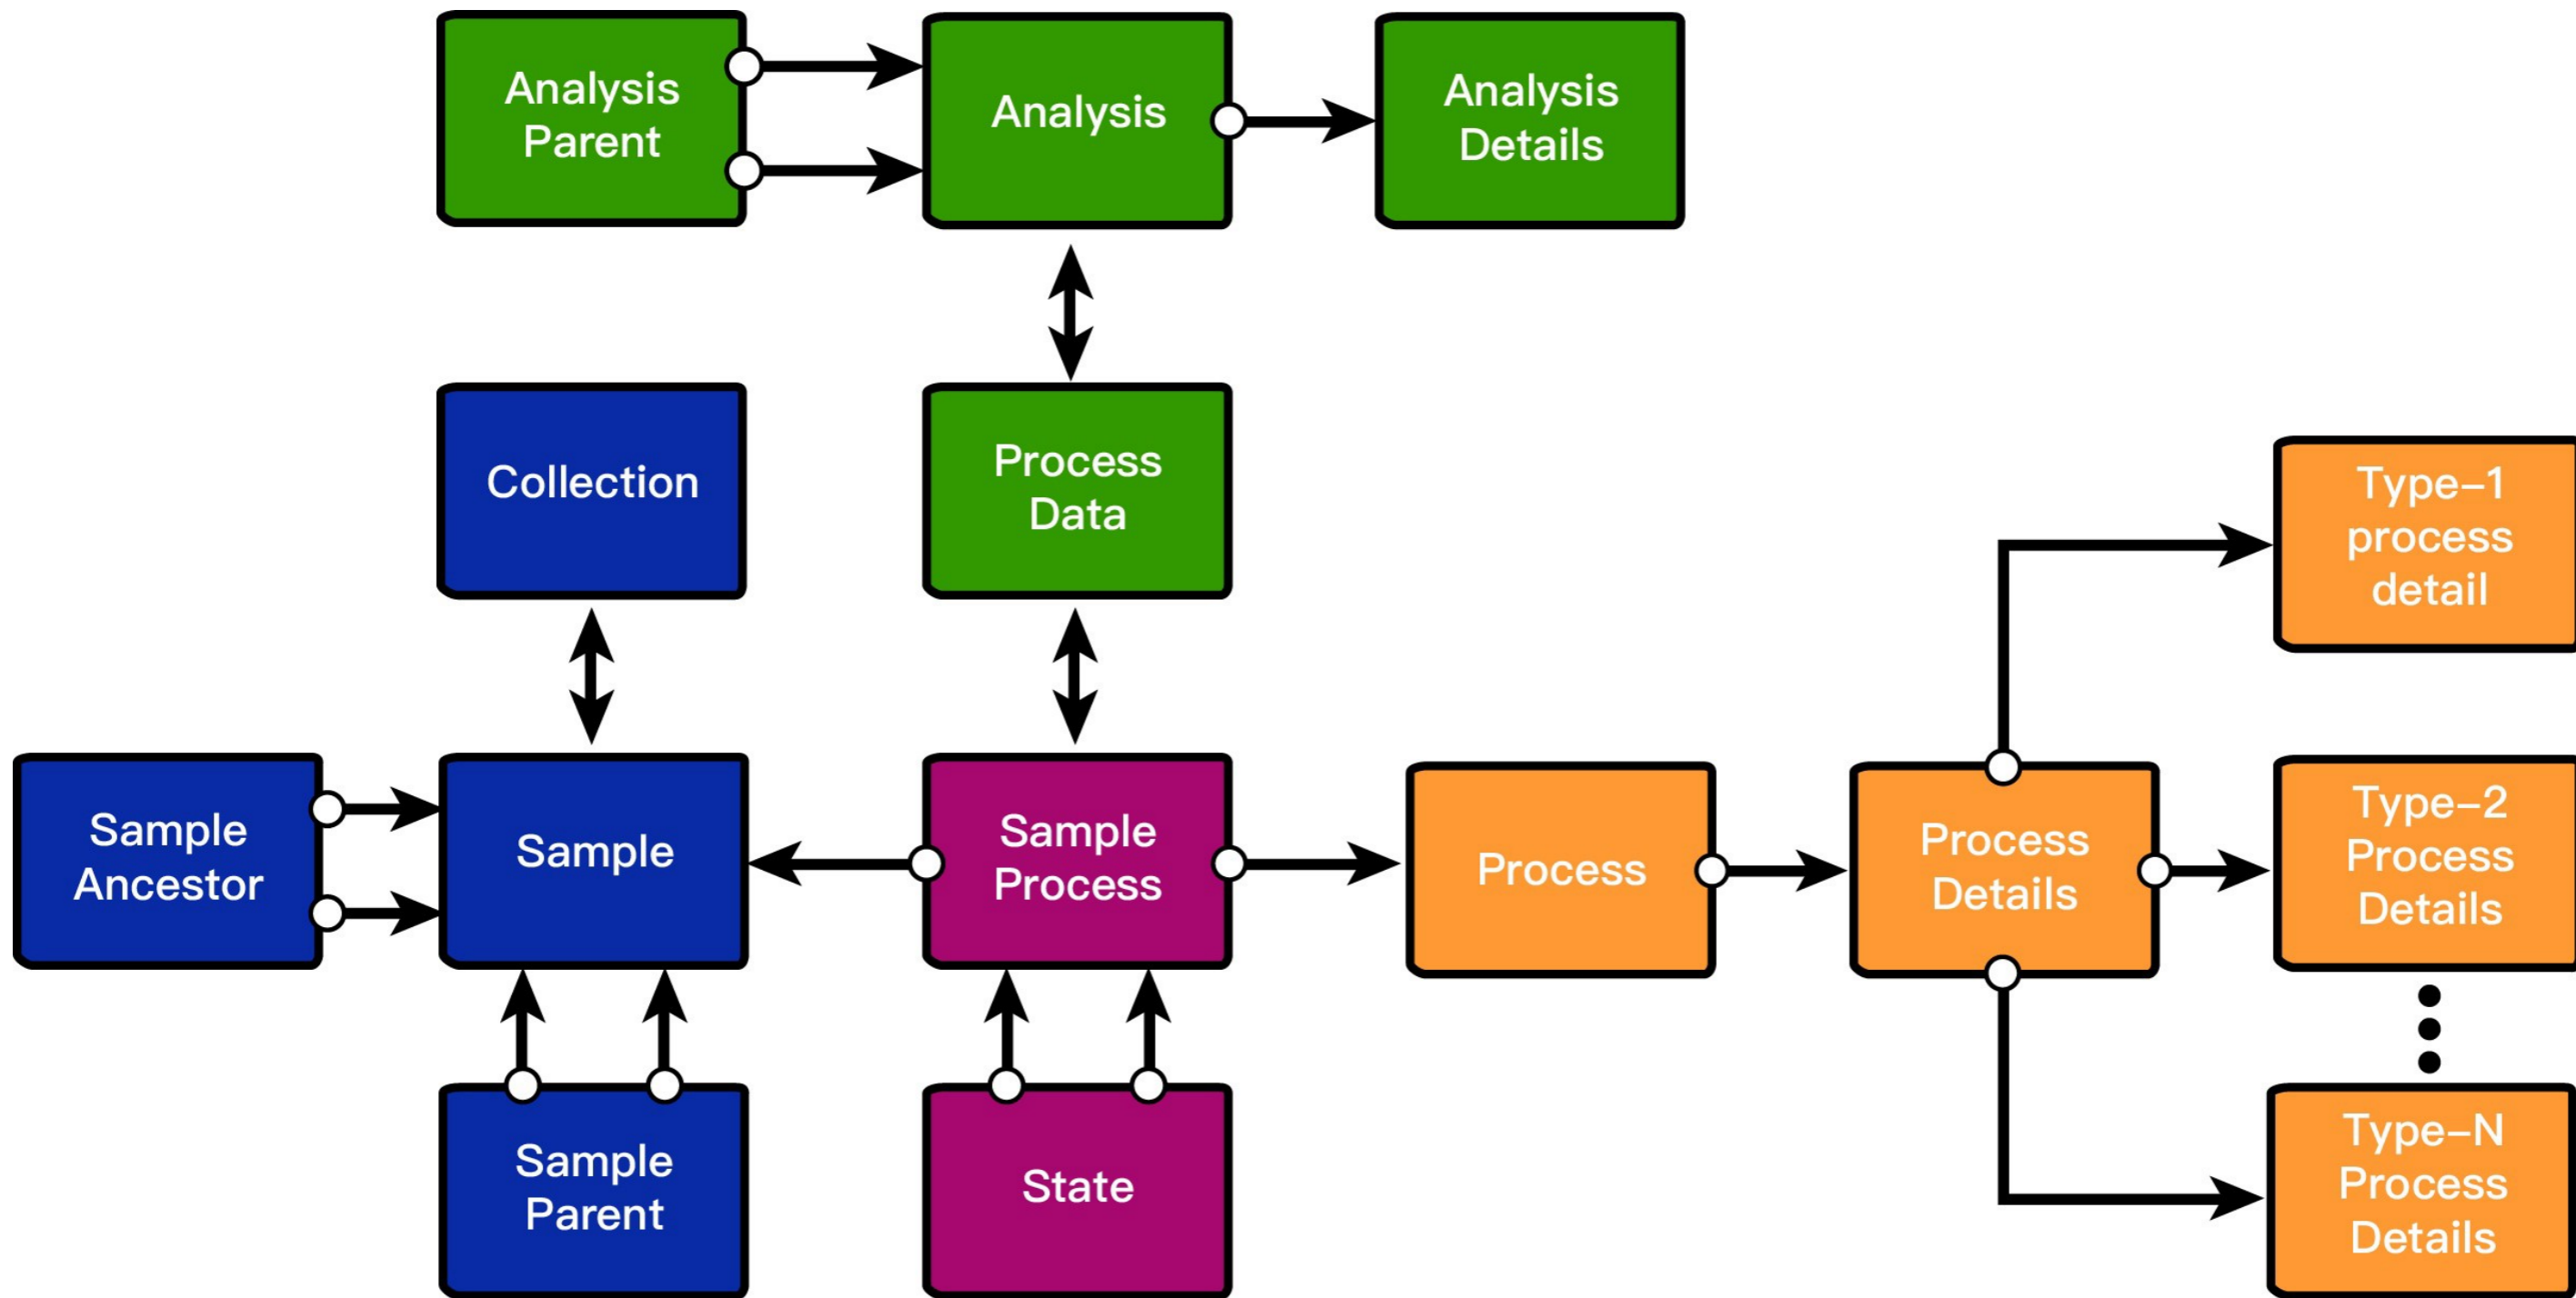

Supplement: d3dd00054k2.pdf [file d3dd00054k2.pdf]

## Triple Key Store

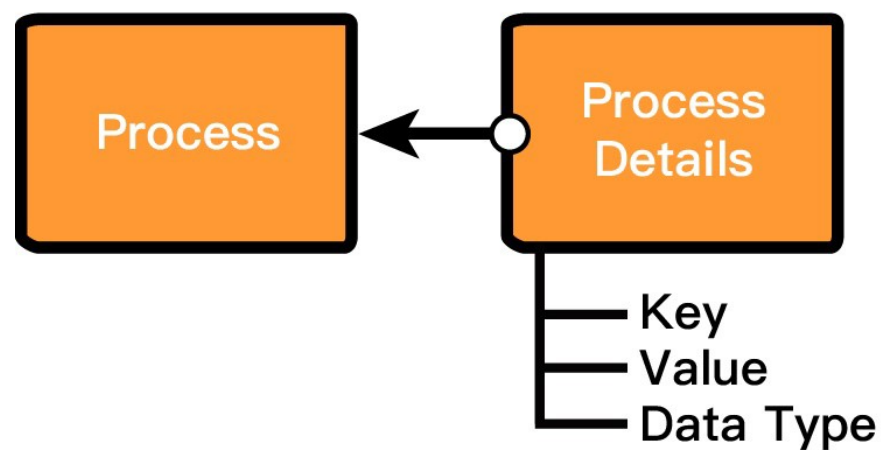

## One Wide Dimension Table

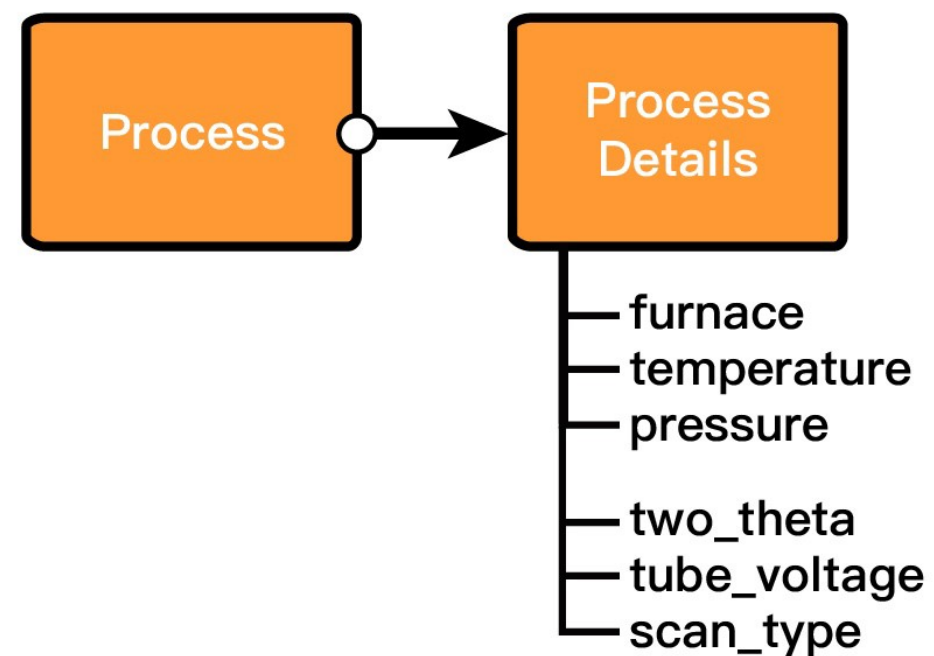

## Thin Process Specific Dimension Tables

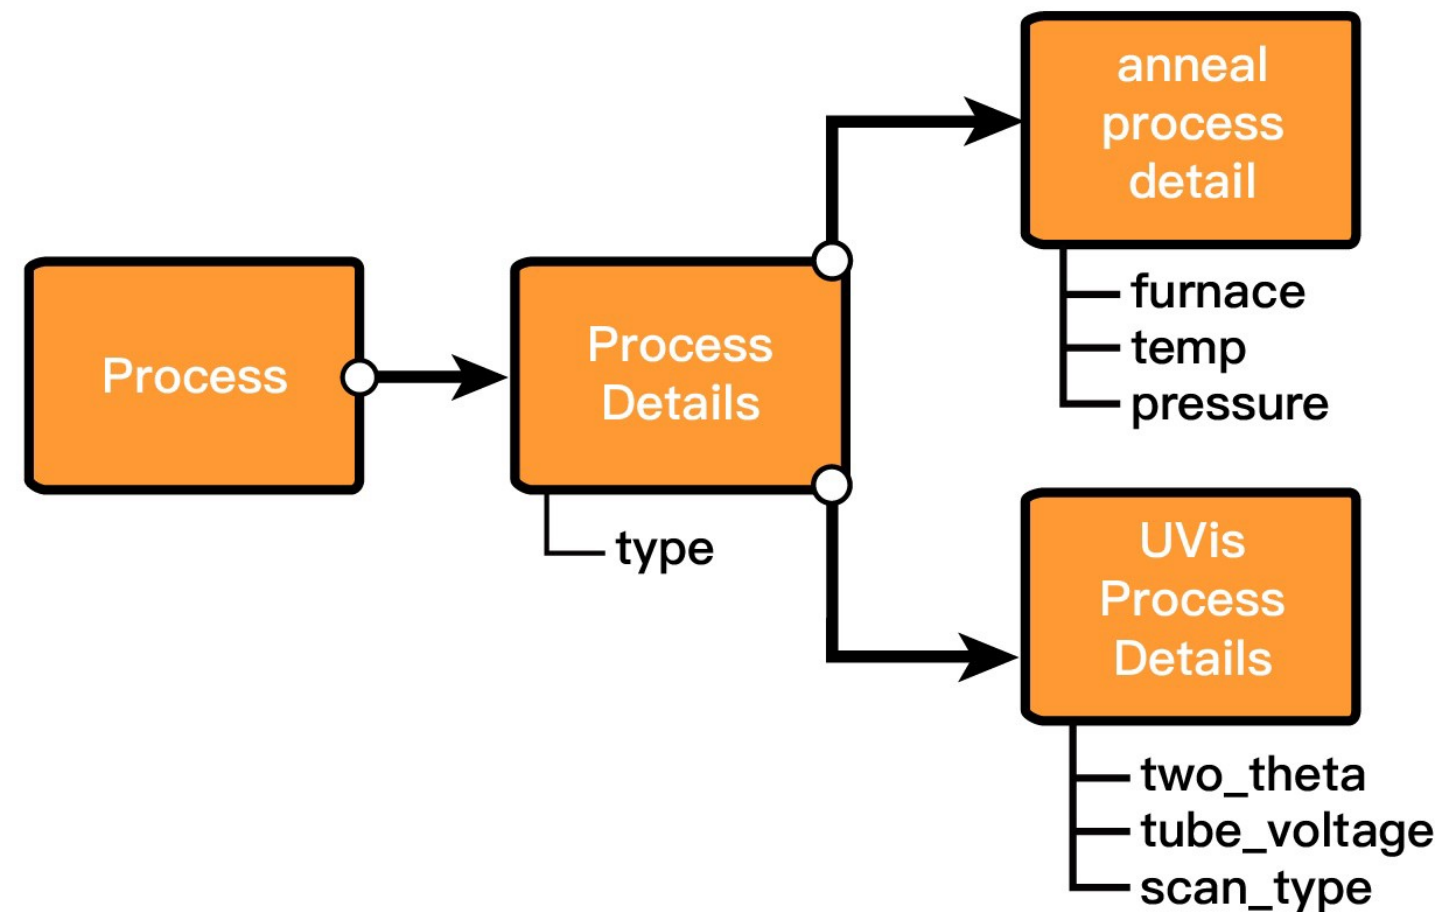

Supplement: d3dd00054k3.pdf [file d3dd00054k3.pdf]

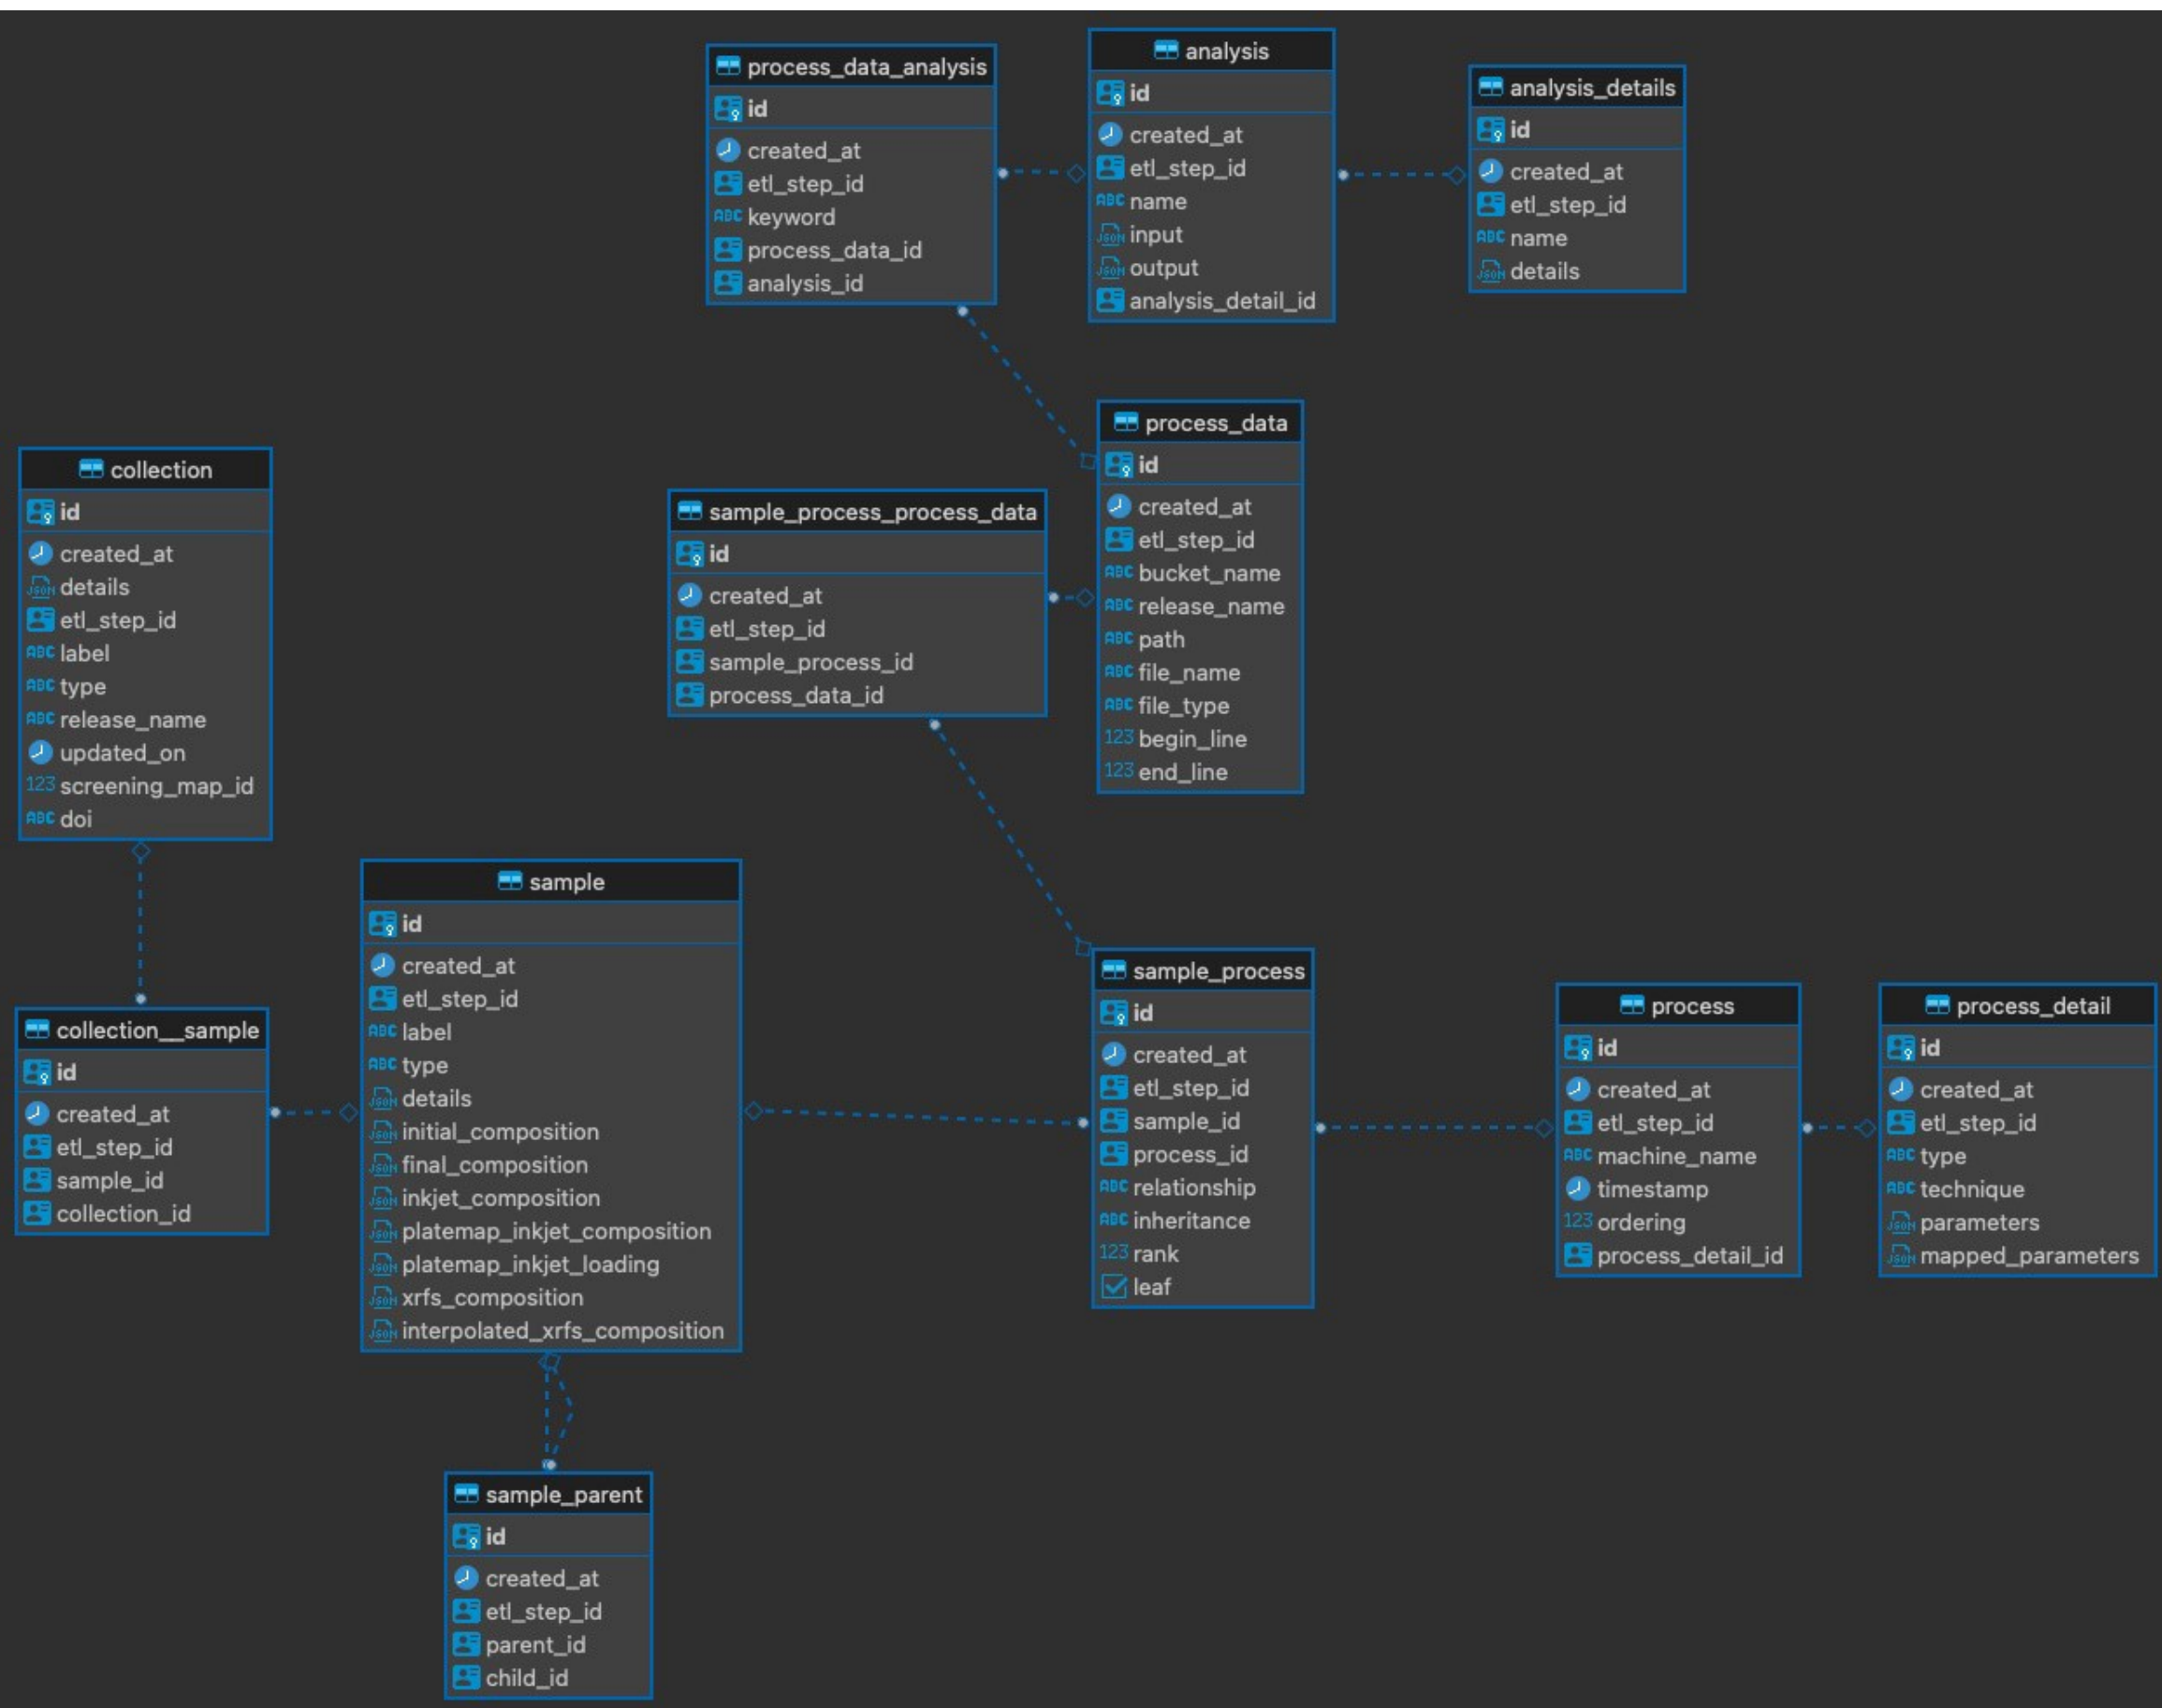

Supplement: d3dd00054k4.pdf [file d3dd00054k4.pdf]
